# Supplementary material for: Early Initiation of Adalimumab Significantly Diminishes Post-operative Crohn’s Disease Endoscopic Recurrence and Is Superior to 6-Mercaptopurine Therapy. An Open Label Randomized Controlled Study
Source: Preprints.org preprint supplement (doi:10.20944/preprints202310.1619.v1), 2023-10-25
Supplement: Supplementary file 1 [file supplementary]

**Appendix A**

**Supplement table A1.** Hazard ratio for endoscopic recurrence at week 58 post surgery

| **Study population (n=35)** | | Rutgeerts < i2 (n=14) | Rutgeerts ≥ i2 (n=21) | HR (95% CI) |
| --- | --- | --- | --- | --- |
| **Study drug n(%)** | 6MP | 4(25) | 12(75) | 0.39 (0.16-0.93) |
| adalimumab | 10(53) | 9(47) |
| Small bowel diameter [cm] [median±SD] | | 3.25±0.9 | 3.5±1.6 | 1.4 (1-1.8) |
| Week 18 | Weight [Kg] [median±SD] | 71±13.8 | 61±19.1 | 0.97 (0.95-1) |
| BMI [Kg/m2] [median±SD] | 24±3 | 20.5±6 | 0.92 (0.86-0.98) |
| Hemoglobin [g/dL] [mean±SE] | 13.7±0.5 | 12.5±0.4 | 0.78 (0.62-0.99) |
| CRP at Week 32 [mg/dL] [median±SD] | | 1.5±1.9 | 2.1±6 | 1.1 (1-1.2) |
| Change from baseline at week 18 | Weight [Kg] [median±SD] | 4.6±2.5 | 2.8±15.5 | 0.97 (0.95-1) |
| BMI [Kg2/m] [median±SD] | 1.7±0.8 | 1±5 | 0.92 (0.85-1) |
| Hemoglobin [g/dL] [mean±SE] | 1±0.3 | 0.16±0.3 | 0.63 (0.44-0.91) |
| Change from baseline at week 32 | Weight [Kg] [mean±SE] | 6.7±1 | 3.6±0.8 | 0.87 (0.77-0.99) |
| BMI [Kg2/m] [mean±SE] | 2.2±0.3 | 1.3±0.3 | 0.69 (0.48-0.99) |
| Change from week 18 at week 32 | Hemoglobin [g/dL] [mean±SE] | 0.17±0.2 | 1±0.2 | 1.8 (1.2-2.6) |

Abbreviations: BMI (Body Mass Index), WBC (White Blood Cells), PLT (Platelets), ALT (Alanine aminotransferase), AST (Aspartate aminotransferase), CRP (C-reactive protein), IBDQ (Inflammatory Bowel Disease Questionnaire), SF36 (36-Item Short Form Survey), CDAI (Crohn’s Disease Activity Index), SE (Standard Error), SD (Standard Deviation)

**Supplement table A2.** Week 32 endoscopic recurrence by week 18 characteristics change from baseline

| **Study population (n=35)** | | Rutgeerts < i2 (n=20) | Rutgeerts ≥ i2 (n=15) | p-value |
| --- | --- | --- | --- | --- |
| **BMI delta from baseline [Kg/m2] [median±SD]** | | 1.7±1 | 0.9±6 | *0.1* |
| Labs (change from baseline at week 18) | Hemoglobin [g/dL] [mean±SE] | 1.1±0.3 | -0.4±0.3 | 0.0005 |
| WBC [10e3/µL] [median±SD] | -0.55±2 | -1.1±3.3 | *0.5* |
| PLT [10e3/µL] [median±SD] | -20±67 | -7.5±31 | 0.3 |
| ALT [U/L] [mean±SE] | -5±4 | -12±3.4 | 0.2 |
| AST [U/L] [median±SD] | -1±9.4 | -7.5±7.3 | *0.3* |
| CRP [mg/dL] [median±SD] | -2.42±4.2 | -0.3±18.8 | *0.6* |
| Stool calprotectin [µg/gr] [mean±SE] | -155.3±24.2 | -18.8±83 | *0.4* |
| Clinical scores delta from baseline at week 18 | IBDQ [mean±SE] | 6.4±4.4 | 2.6±6.8 | 0.7 |
| SF36 [mean±SE] | 367±137 | 192±137 | 0.4 |
| CDAI [median±SD] | -14±42.3 | -10±59.2 | 0.5 |

Abbreviations: BMI (Body Mass Index), WBC (White Blood Cells), PLT (Platelets), ALT (Alanine aminotransferase), AST (Aspartate aminotransferase), CRP (C-reactive protein), IBDQ (Inflammatory Bowel Disease Questionnaire), SF36 (36-Item Short Form Survey), CDAI (Crohn’s Disease Activity Index), SE (Standard Error), SD (Standard Deviation).
